18 **ABSTRACT**

19 Iron (Fe) is crucial for crop productivity and quality. However, Fe deficiency is  
20 prevalent worldwide, especially in alkaline soil. Plants have evolved  
21 sophisticated mechanisms to withstand Fe deficiency conditions. *Oryza sativa*  
22 IRON-RELATED BHLH TRANSCRIPTION FACTOR 3 (*OsiRO3/OsbHLH63*)  
23 has been identified as a negative regulator of Fe deficiency response  
24 signaling, however, the underlying mechanism remains unclear. In the present  
25 study, we constructed two *iro3* mutants which generated leaves with necrotic  
26 lesions under Fe deficient conditions. Loss-of-function of *OsiRO3* caused  
27 upregulation of Fe deficiency-associated genes in the root under Fe deficient  
28 conditions. Fe concentration measurement showed that the *iro3* mutants had  
29 increased shoot Fe concentration only under Fe deficient conditions. Further  
30 analysis revealed that *OsiRO3* directly regulated the expression of *IRON-*  
31 *RELATED BHLH TRANSCRIPTION FACTOR 2 (OsiRO2)* which encodes a  
32 positive regulator of Fe uptake system. Protein interaction tests indicated that  
33 *OsiRO3* interacted with *OsPRI1* and *OsPRI2*. Further investigation  
34 demonstrated that *OsiRO3* repressed the transactivation of *OsPRI1* and  
35 *OsPRI2* towards *OsiRO2*. *OsiRO3* contains an EAR motif which recruits the  
36 TOPLESS/TOPLESS-RELATED (*OsTPL/OsTPRs*) corepressors. Mutation of  
37 the EAR motif attenuated the repression ability of *OsiRO3*. This work sheds  
38 light on the molecular mechanism by which *OsiRO3* modulates Fe  
39 homeostasis in rice.

## 40 INTRODUCTION

41 Iron (Fe) is one of the indispensable micronutrients for plant growth and  
42 development, which is involved in many physiological and biochemical  
43 reactions such as photosynthesis, mitochondrial respiration, hormone  
44 biosynthesis, nitrogen fixation and so on (Hänsch and Mendel, 2009; Balk and  
45 Schaedler, 2014). Although Fe is abundant on earth, its availability is limited  
46 due to the low solubility at alkaline pH (Mori, 1999). Calcareous soil accounts  
47 for about one third of the world's cultivated soil, making Fe deficiency a very  
48 common phenomenon (Guerinot and Yi, 1994). Fe deficiency often leads to  
49 interveinal chlorosis of leaves, as well as greatly affecting the yield and  
50 nutritional quality of crops (Briat et al., 2015). Reactive oxygen radicals  
51 produced by excess Fe are toxic to plant cells (Valko et al., 2005). Therefore,  
52 the Fe concentration in plant cells needs to be regulated strictly.

53 To cope with Fe deficiency, plants have developed complicated molecular  
54 mechanisms for Fe uptake, translocation, and storage to meet Fe demand.  
55 Plants have evolved different strategies to absorb Fe (Römheld and  
56 Marschner, 1986). Gramineous plants employ a chelation strategy to acquire  
57 Fe. They excrete mugineic acid family phytosiderophores (MAs) to chelate  
58  $Fe^{3+}$  to form MA- $Fe^{3+}$  complex which is translocated into roots by YS/YSL  
59 transporters. In rice, the synthesis of MAs is mediated by a series of enzymes,  
60 including S-adenosylmethionine synthetase (SAMS), nicotianamine synthase  
61 (NAS), nicotianamine aminotransferase (NAAT), and deoxymugineic acid  
62 synthase (DMAS) (Shojima et al., 1990; Mori 1999; Bashir et al., 2017). The  
63 efflux of MAs from roots counts on TRANSPORTER OF MAs 1 (OsTOM1)  
64 (Nozoye et al., 2011) and the influx of  $Fe^{3+}$ -MA to roots involves YELLOW

65 STRIP LIKE 15 (OsYSL15) (Inoue et al., 2009; Lee et al., 2009). In addition to  
66 the chelation strategy, rice plants also directly acquire Fe<sup>2+</sup> by the Fe<sup>2+</sup>  
67 transporter OsIRT1 (Ishimaru et al., 2006).

68 The Fe deficiency response is under the control of a series of transcription  
69 factors which constitute a complex regulatory network. IRON-RELATED BHLH  
70 TRANSCRIPTION FACTOR 2 (OsIRO2) is a key positive transcription factor  
71 of Fe homeostasis, which positively modulates the expression of chelation  
72 strategy associated genes including *OsNAS1*, *OsNAS2*, *OsNAAT1*,  
73 *OsDMAS1*, *OsTOM1*, and *OsYSL15* (Ogo et al., 2007; Liang et al., 2020;  
74 Wang et al., 2020). *Oryza sativa* FER-LIKE FE DEFICIENCY-INDUCED  
75 TRANSCRIPTION FACTOR (OsFIT)/OsbHLH156 was identified as an  
76 interacting partner of OsIRO2. OsIRO2 protein mainly localizes to the  
77 cytoplasm, and OsFIT can facilitate the nuclear accumulation of OsIRO2  
78 under Fe limited conditions (Liang et al., 2020; Wang et al., 2020). OsFIT and  
79 OsIRO2 interdependently regulate the expression of chelation strategy  
80 associated genes (Liang et al., 2020). *OsIRO2* is inducible by Fe deficiency  
81 both in the root and shoot (Ogo et al., 2007), and its upregulation is  
82 dependent on *Oryza sativa* POSITIVE REGULATOR OF IRON  
83 HOMEOSTASIS (OsPRI) proteins, OsPRI1 (OsbHLH60), OsPRI2  
84 (OsbHLH58), and OsPRI3 (OsbHLH59) (Zhang et al., 2017, 2020; Kobayashi  
85 et al., 2019). *Oryza sativa* HEMERYTHRIN MOTIF-CONTAINING REALLY  
86 INTERESTING NEW GENE AND ZINC-FINGER PROTEIN1 (OsHRZ1) and  
87 OsHRZ2 are two potential Fe sensors, which negatively regulate the  
88 expression of Fe deficiency inducible genes (Kobayashi et al., 2013).  
89 OsHRZ1 possesses a RING domain responsible for its E3 ligase activity.

90 Recently, it is established that OsHRZ1 interacts with OsPRI1/2/3 and  
91 promotes the degradation of the latter (Zhang et al., 2017, 2020).

92 OsIRO3 was identified as a nuclear-localized negative regulator of Fe  
93 homeostasis (Zheng et al., 2010). Similar to OsIRO2, OsIRO3 is also  
94 inducible under Fe deficient conditions and directly regulated by OsPRI1/2/3  
95 (Zhang et al., 2017, 2020; Kobayashi et al., 2019). Overexpression of *OsIRO3*  
96 causes leaf chlorosis, reduced shoot Fe concentration, and downregulation of  
97 Fe deficiency inducible genes (Zheng et al., 2010). Recently, two different  
98 groups generated and analyzed *iro3* loss-of-function mutants (Wang et al.,  
99 2020a; Wang et al., 2020b). Wang et al. (2020a) showed that the expression  
100 of Fe deficiency inducible genes increased in the root of *iro3* mutants, but  
101 Wang et al. (2020b) showed that OsIRO3 regulates only *OsNAS3*, but not  
102 other Fe deficiency inducible genes. Moreover, the underlying molecular  
103 mechanism by which OsIRO3 regulates Fe homeostasis remains unclear. In  
104 the present study, we showed that the loss-of-function of *OsIRO3* caused the  
105 up-regulation of many Fe deficiency inducible genes in the root. Further  
106 investigation found that OsIRO3 directly binds to and inhibits the promoter of  
107 *OsIRO2*. On the other hand, OsIRO3 physically interacts with OsPRI1/2 and  
108 represses the transactivation ability of the latter to OsIRO2. Additionally,  
109 OsIRO3 contains an EAR motif recruiting the OsTPL/OsTPRs corepressors,  
110 which partially accounts for its repression function.

## 111 RESULTS

### 112 Loss-of-function of *OsIRO3* impairs the Fe deficiency response

113 To further clarify the functions of *OsIRO3* in the Fe deficiency response, we  
114 generated two *iro3* loss-of-function mutants with the CRISPR-Cas9 gene  
115 editing system. Two independent lines, *iro3-del1* with a deletion of nucleotide  
116 T in exon 4 and *iro3-del61* with a deletion of 61 bp in exon 3 were selected for  
117 further analysis (Figure 1A). Under Fe sufficient conditions, wild type and *iro3*  
118 mutant plants showed no discernable differences (Figure 1B). Under Fe  
119 deficient conditions, the wild type plants displayed the typical Fe deficiency  
120 symptom, chlorotic leaves. In contrast, three days after transfer to Fe  
121 deficiency medium, the mutants developed brown necrotic lesions in leaves,  
122 and the necrotic lesions gradually increased with the duration of Fe deficiency  
123 treatment. Meanwhile, compared with the wild type plants, the mutant plants  
124 developed dwarf shoots (Figure 1B). To explore whether loss-of-function of  
125 *OsIRO3* affects Fe homeostasis, we measured the Fe concentration in the  
126 root and shoot. Although the Fe concentration in the root and shoot of *iro3*  
127 mutants was not significantly different from that in the wild type under Fe  
128 sufficient conditions, the shoot Fe concentration in the *iro3* mutants was  
129 obviously higher than that in the wild type plants under Fe deficient conditions  
130 (Figure 1C), indicating that Fe translocation from root to shoot was enhanced  
131 in the *iro3* mutants. Collectively, these data suggest that loss-of-function of  
132 *OsIRO3* leads to the disruption of Fe homeostasis.

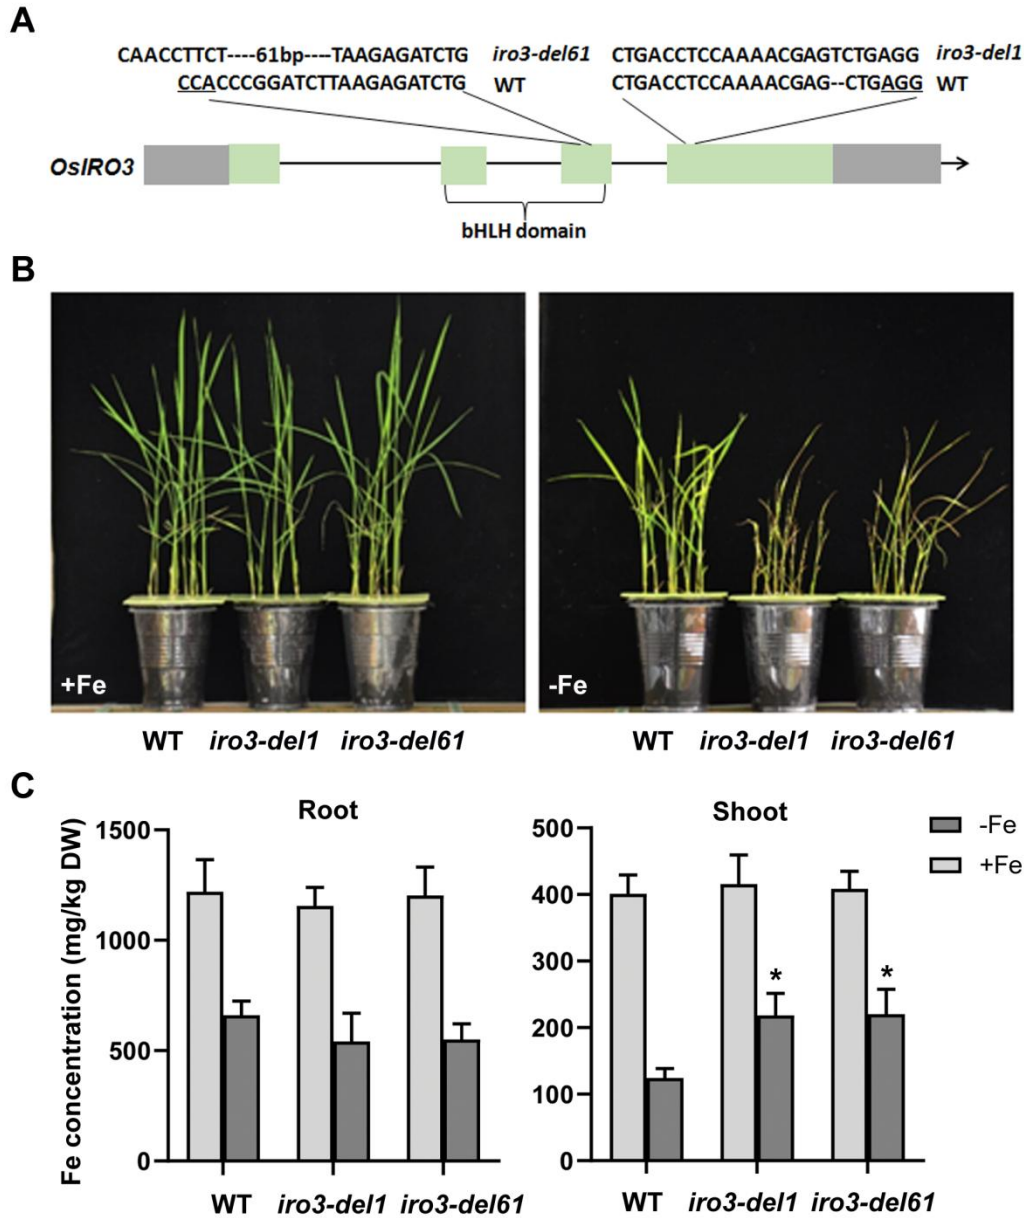

133

134 **Figure 1. Identification of *iro3* mutants.**

135 (A) Mutations generated in the *iro3* mutants by CRISPR/Cas9. The underlined  
136 three letters indicate the PAM region. The *iro3-del1* mutant contains a deletion  
137 of nucleotide T in exon 4 and the *iro3-del61* mutant contains a deletion of 61  
138 bp in exon 3. The genotypes of *iro3-del1* and *iro3-del61* are indicated.

139 (B) Phenotypes of *iro3* mutants. Seeds were grown in +Fe (0.1 mM Fe<sup>3+</sup>)  
140 solution for two weeks, and then shifted to +Fe or -Fe (Fe free) solution for  
141 one week.

142 (C) Fe concentration in the *iro3* mutants. Two-week-old seedlings grown in  
143 +Fe were transferred to +Fe or -Fe solution for 1 week. Shoots and roots  
144 were separately sampled and used for metal measurement. Error bars  
145 represent the SD ( $n = 3$ ). The value which is significantly different from the  
146 corresponding wild-type (WT) value was indicated by \* ( $P < 0.05$ ), as  
147 determined by Student's *t* test. DW, Dry weight.

148



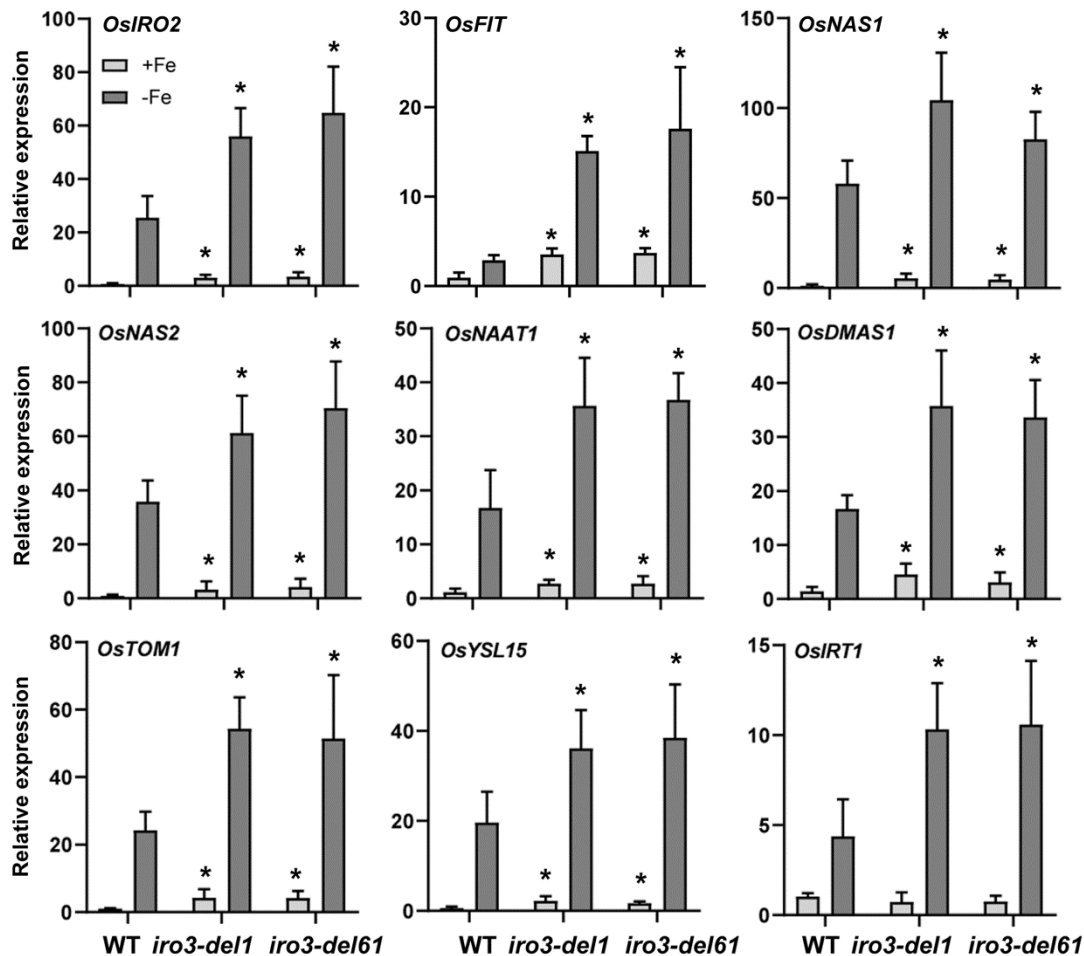

149

150 **Figure 2. Expression of Fe deficiency inducible genes in the *iro3***  
 151 **mutants.**

152 Two-week-old seedlings grown in +Fe solution were transferred to +Fe or -Fe  
 153 solution for 7 days. Roots were sampled and used for RNA extraction. The  
 154 numbers above the bars indicate the corresponding mean values. Error bars  
 155 represent the SD ( $n = 3$ ). The value which is significantly different from the  
 156 corresponding wild-type (WT) value was indicated by \* ( $P < 0.05$ ), as  
 157 determined by Student's *t* test.

158

159 **Loss-of-function of *OsIRO3* results in the activation of *OsIRO2* regulon**

160 Given that the loss of *OsIRO3* function disrupted the Fe homeostasis of rice,

161 we wondered whether the expression of Fe deficiency inducible genes was

162 changed in the *iro3* mutants. Therefore, we detected the gene expression of

163 several representative Fe deficiency inducible genes. *OsIRO2* and *OsFIT* are

164 the master regulators of the Fe deficiency response, which positively regulate

165 not only the Strategy II associated genes (Ogo et al., 2007; Liang et al., 2020;



166 Wang et al., 2020), such as *OsNAS1*, *OsNAS2*, *OsNAAT1*, and *OsDMAS1*  
167 which encode the enzymes responsible for DMA synthesis (Inoue et al., 2003;  
168 Cheng et al., 2007; Bashir et al., 2017), *OsTOM1*, product of which accounts  
169 for the excretion of DMA (Nozoye et al., 2011), and *OsYSL15* which encodes  
170 an Fe (III)-DMA transporter (Inoue et al., 2009; Lee et al., 2009), but also the  
171 Strategy I associated gene *OsIRT1* (Ishimaru et al., 2006). When suffering Fe  
172 deficiency, rice plants initiate the expression of these genes. We found that  
173 the expression of *OsIRO2* and *OsFIT* and their downstream genes was  
174 considerably enhanced in the root of *iro3* mutants regardless of Fe status,  
175 which is in consistence with the negative function of *OsIRO3*. These results  
176 suggest that the expression of Fe deficiency inducible genes is disrupted in  
177 the *iro3* mutants.

178

### 179 ***OsIRO3* directly represses the expression of *OsIRO2***

180 Given that *OsIRO2* and *OsFIT* and their downstream genes are  
181 downregulated in the *OsIRO3* overexpression plants (Zheng et al., 2010), and  
182 upregulated in the *iro3* plants (Figure 2), we speculated that *OsIRO3* might  
183 directly regulate the expression of *OsIRO2* and *OsFIT*. The bHLH family  
184 transcription factors can bind to the E-box motifs of their target genes (Fisher  
185 and Goding, 1992). Several E-box motifs (CANNTG) exist in the promoters of  
186 *OsIRO2* and *OsFIT* (Figure S1; Zhang et al., 2017, 2020). Electrophoresis  
187 mobility shift assays (EMSAs) were performed to test whether *OsIRO3*  
188 directly binds to the promoters of *OsIRO2* and *OsFIT*. 6xHis (histidine) tagged  
189 *OsIRO3* (His-*OsIRO3*) was expressed and purified from *E. coli*. When His-  
190 *OsIRO3* was incubated with biotin-labeled probe of *OsIRO2*, a prominent

191 DNA-protein complex was detected. The binding capacity decreased as wild-  
192 type unlabeled probe increased, however, the addition of mutated wild-type  
193 unlabeled probe without an E-box did not affect the abundance of the DNA-  
194 protein complex (Figure 3A). The same EMSAs were conducted using the  
195 *OsFIT* probe, indicating that OsIRO3 could not bind to the promoter of *OsFIT*.  
196 These results suggest that OsIRO3 directly associates with the promoter of  
197 *OsIRO2*, but not of *OsFIT*.

198 To investigate whether OsIRO3 directly binds to and represses the promoter  
199 of *OsIRO2*, we prepared a reporter plasmid, *Pro<sub>IRO2</sub>:nGFP*, in which a nuclear  
200 localization signal fused *GFP* (*nGFP*) was driven by the 2204 bp upstream  
201 region of *OsIRO2* (Figure 3B). For the effector plasmids, MYC-tagged OsPRI1  
202 and OsIRO3 were respectively cloned downstream of the 35S promoter.  
203 Transient expression assays were performed in tobacco leaves (Figure 3C).  
204 As a positive control, OsPRI1 significantly activated the expression of *GFP*. In  
205 contrast, OsIRO3 repressed the expression of *GFP*. These results indicate  
206 that OsIRO3 directly binds to and represses the *OsIRO2* promoter.

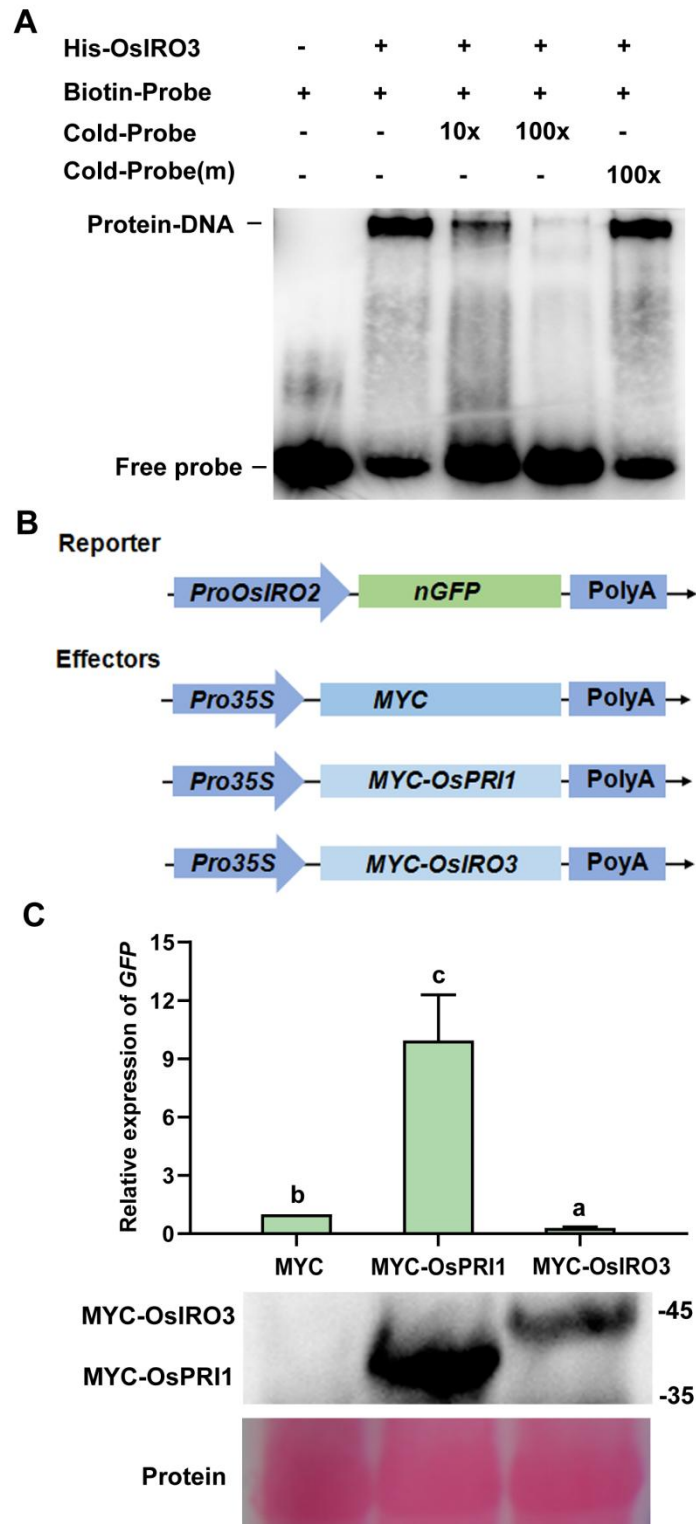

207

208 **Figure 3. OsIRO3 binds to the promoter of *OsIRO2*.**

209 (A) EMSA assays. Biotin-labeled DNA probe was incubated with the  
210 recombinant His-OsIRO3 protein. An excess of unlabeled probe (Cold-Probe)  
211 or unlabeled mutated probe (Cold-Probe-m) was added to compete with  
212 labeled probe (Biotin-Probe). Biotin-probe incubated with His protein served  
213 as the negative control.

214 (B) Schematic representation of the constructs used for transient expression

215 assays. In the reporter, the *OsIRO2* promoter was used to drive a nuclear  
216 localization sequence fused GFP (nGFP). In the effectors, MYC, MYC-  
217 OsPRI1, and MYC-OsIRO3 are under the control of the cauliflower mosaic  
218 virus (CaMV) 35S promoter.

219 (C) *GFP* transcript abundance. Protein levels of effectors were detected by  
220 immunoblot. Ponceau staining shows equal loading. *GFP* transcript  
221 abundance was normalized to *NPTII* transcript. The value with the empty  
222 vector (MYC) as an effector was set to 1. The different letters above each bar  
223 indicate statistically significant differences as determined by one-way ANOVA  
224 followed by Tukey's multiple comparison test ( $P < 0.05$ ).

225

## 226 **OsIRO3 interacts with OsPRI1 and OsPRI2**

227 Generally, bHLH transcription factors regulate downstream target genes by  
228 forming homodimers or heterodimers (Toledo-Ortiz et al., 2003). Considering  
229 that the Fe deficiency inducible genes regulated by OsIRO3 are also  
230 regulated by OsPRIs (OsPRI1, OsPRI2, and OsPRI3) (Zhang et al., 2017;  
231 Zhang et al., 2020), we speculated that OsIRO3 interacts with OsPRIs to form  
232 heterodimers to modulate the Fe deficiency response.

233 Yeast two-hybrid assays were used to test the potential protein interactions.  
234 Since the strong self-activation of the full length OsIRO3, the N-terminal part  
235 of OsIRO3 (OsIRO3n) containing the bHLH domain was fused with the GAL4  
236 DNA binding domain (BD) as the bait. Four OsPRIs were respectively fused to  
237 the GAL4 activating domain (AD) as preys. Yeast two-hybrid assays showed  
238 that OsPRI1 and OsPRI2, but not OsPRI3 and OsPRI4, interact with OsIRO3  
239 (Figure 4A). To further verify the interactions between OsIRO3 and OsPRI1/2,  
240 pull-down assays were carried out. OsPRI1 and OsPRI2 were fused with the  
241 GST (glutathione S-transferase) tag respectively, and OsIRO3 was fused with  
242 the 6xHis tag. Proteins were expressed and purified from *E. coli*. GST, GST-  
243 OsPRI1, and GST-OsPRI2 were respectively co-incubated with His-tagged  
244 OsIRO3 and then eluted. The immunoblot results showed that GST-OsPRI1

245 and GST-OsPRI2 pulled down His-OsIRO3, but GST did not (Figure 4B). To  
 246 further verify whether their interactions also occur in plant cells, tripartite split-  
 247 GFP assays were performed in *Nicotiana benthamiana* leaves. The GFP10  
 248 fragment was fused with the N-end of OsIRO3 (GFP10-OsIRO3) and the  
 249 GFP11 fragment with the C-end of OsPRI1/2 (OsPRI1/2-GFP11). When  
 250 OsPRI1-GFP11 (or OsPRI2-GFP11) was co-expressed with GFP10-OsIRO3  
 251 and GFP1-9, strong fluorescence signal was detected in the nucleus, whereas  
 252 fluorescence signal was hardly detected in the cells co-expressing GFP11,  
 253 GFP10-OsIRO3, and GFP1-9 (Figure 4C). All these results indicate that  
 254 OsIRO3 interacts with OsPRI1 and OsPRI2.

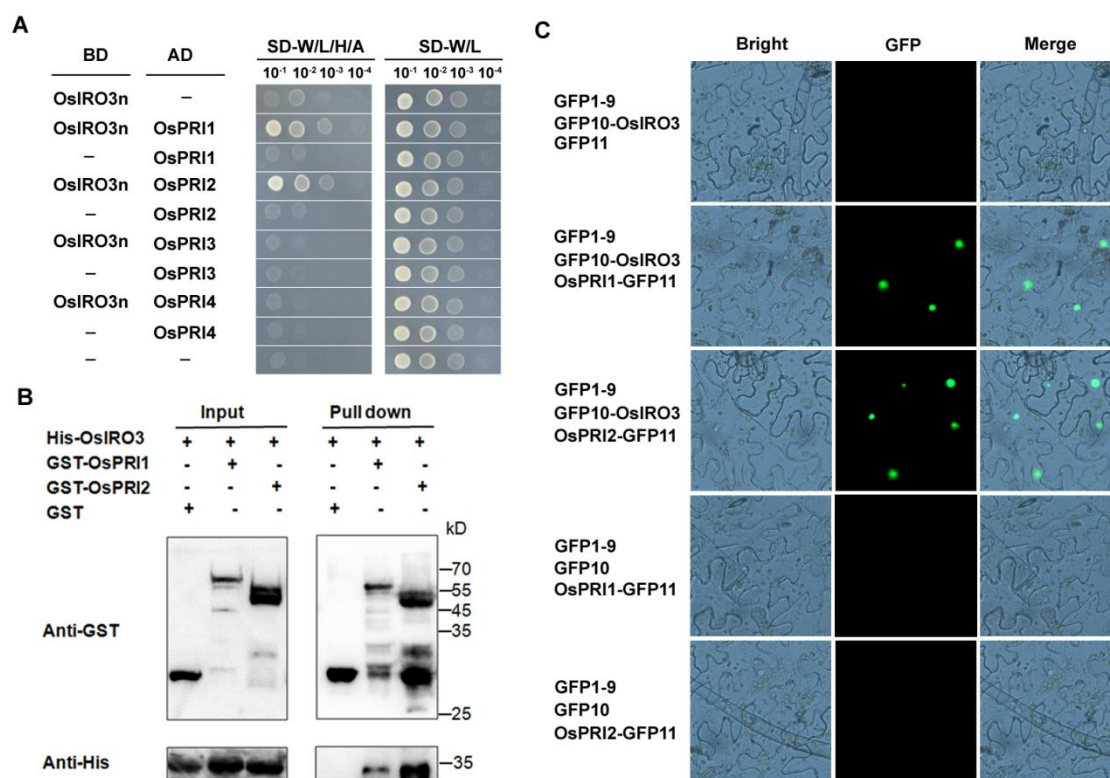

255

256 **Figure 4. OsIRO3 physically interacts with OsPRI1 and OsPRI2.**  
 257 (A) Yeast two-hybrid analysis of the interactions between OsIRO3 and  
 258 OsPRI1/2. Yeast cotransformed with different BD and AD plasmid  
 259 combinations was spotted on synthetic dropout medium lacking Leu/Trp (SD-  
 260 W/L) or Trp/Leu/His/Ade (SD-W/L/H/A).  
 261 (B) Pull-down assays. OsPRI1/2 were respectively fused with the GST tag,  
 262 and OsIRO3 was fused with the His tag. Recombinant proteins were  
 263 expressed in *E. coli*. Proteins were pulled down by glutathione Sepharose 4B

264 and detected using the anti-His or anti-GST antibody.  
265 (C) Protein interactions of OsIRO3 and OsPRI1/2 in plant cells. Tripartite split-  
266 sfGFP complementation assays were performed. OsPRI1 and OsPRI2 were  
267 respectively fused with GFP11, and OsIRO3 with GFP10. The constructs were  
268 introduced into agrobacterium respectively, and the indicated combinations  
269 were co-expressed in *N. benthamiana* leaves.

270

### 271 **OsIRO3 inhibits the transactivation of OsPRI1 towards *OsIRO2***

272 It has been established that OsPRI1/2/3 positively regulate the expression of  
273 *OsIRO2* through directly binding to and activating its promoter (Zhang et al.,  
274 2017, 2020). Considering that OsIRO3 interacts with OsPRI1/2, we wanted to  
275 know whether OsIRO3 interferes with the transactivation ability of OsPRI1/2  
276 towards *OsIRO2*. We carried out transient expression assays using the  
277 reporter-effector system above-mentioned (Figure 3B). Compared with the  
278 control effector (MYC), co-expression of OsIRO3 with OsPRI1 significantly  
279 weakened the GFP signal (Figure 5A). These data suggest that OsIRO3  
280 inhibits the transactivation of OsPRI1 towards *OsIRO2*.

281 It has been confirmed that OsPRI1 and OsPRI2 also bind to the *OsIRO2*  
282 promoter, raising the possibility that OsIRO3 competes with OsPRI1/2 for  
283 binding to the *OsIRO2* promoter, hence reducing the expression of *OsIRO2*.  
284 To further clarify whether OsIRO3 directly represses the transactivation  
285 function of OsPRI1 by protein interaction, we employed the GAL4-based  
286 reporter-effector system (Li et al., 2022). For the reporter, the *nGFP* was  
287 driven by a synthetic promoter which consists of five repeats of GAL4 binding  
288 motif and the minimal CaMV 35S promoter (Figure 5B). For the effector, the  
289 GAL4 BD fused with an NLS-mCherry and OsPRI1 was driven by the 35S  
290 promoter (Figure 5B). Compared with the control (nmCherry), OsPRI1  
291 activated the expression of *GFP* (Figure 5C). When OsIRO3 was co-



292 expressed with OsPRI1, the expression of *GFP* was significantly suppressed.

293 These data suggest that OsIRO3 can inhibit the transactivation of OsPRI1

294 through the direct protein interaction with OsPRIs.

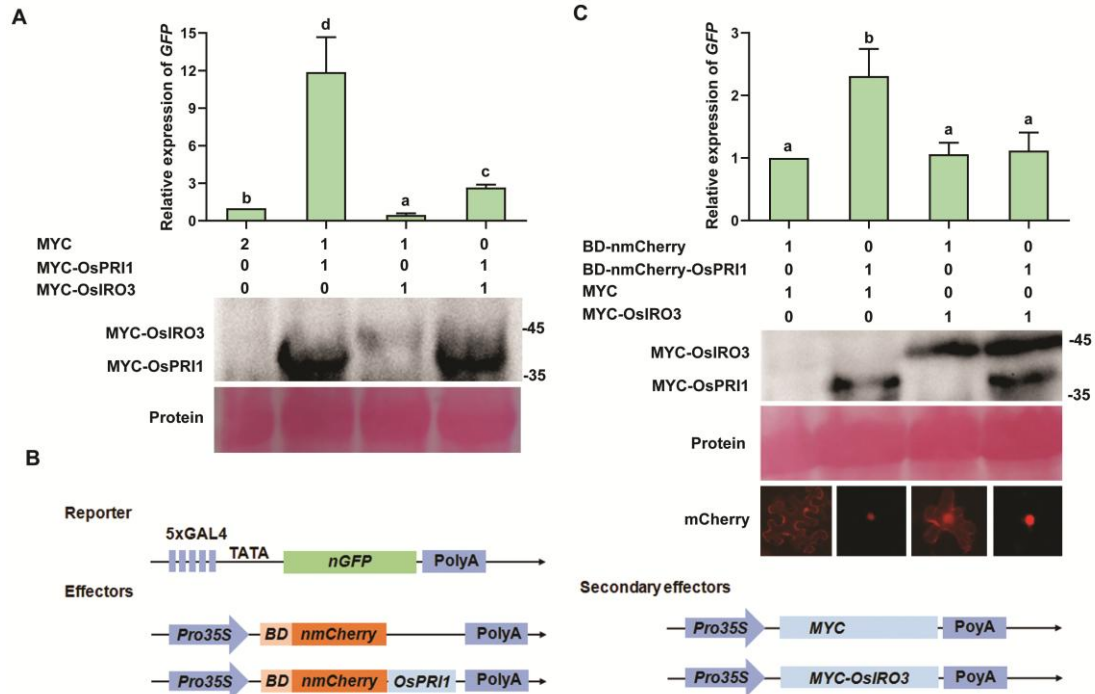

295

296 **Figure 5. OsIRO3 antagonizes the transcriptional activation ability of**  
297 **OsPRI1.**

298 (A) OsIRO3 represses the transcription activation of OsPRI1. The reporter  
299 and effectors are shown in Figure 3B. Protein levels of effectors were  
300 detected by immunoblot. Ponceau staining shows equal loading. The  
301 *GFP/NPTII* ratio represents the *GFP* levels relative to the internal control  
302 *NPTII*.

303 (B) Schematic representation of the constructs used for transient expression  
304 assays. In the reporter, five repeats of GAL4 binding motif and the minimal  
305 CaMV 35S promoter was used as the promoter to drive the nGFP. In the  
306 effectors, BD-nmCherry and BD-nmCherry-OsPRI1 are under the control of  
307 35S promoter. In the secondary effectors, MYC and MYC-OsIRO3 are under  
308 the control of 35S promoter.

309 (C) OsIRO3 inhibits the transcriptional activation ability of OsPRI1 by direct  
310 protein-protein interaction. Protein levels of effectors were detected by  
311 immunoblot. Ponceau staining shows equal loading. The abundance of *GFP*  
312 was normalized to that of *NPTII*. The value with the control (nmCherry) was  
313 set to 1. The different letters above each bar indicate statistically significant  
314 differences as determined by one-way ANOVA followed by Tukey's multiple  
315 comparison test ( $P < 0.05$ ).

316

317 **OsIRO3 interacts with the co-repressors OsTPL/OsTPRs**

318 Many negative transcription factors exert repression functions by their EAR



319 recruiting transcriptional co-repressors TOPLESS/TOPLESS-RELATED  
320 (TPL/TPRs). Two types of EAR motifs, LxLxL and DLNxxP, have been  
321 characterized (Kagale et al., 2010; Causier et al., 2012). We searched all  
322 known transcription factors involved in the Fe deficiency response of rice for  
323 EAR motifs, finding that both OsIRO2 and OsIRO3 contain a typical LxLxL  
324 EAR motif (Figure 6A).

325 Subsequently, we wondered whether both OsIRO2 and OsIRO3 could  
326 interact with OsTPL/OsTPRs. We employed the yeast two-hybrid assays to  
327 test their protein interactions (Figure 6B). Given that the N-terminal of  
328 OsTPL/OsTPRs is responsible for the interaction with EAR motifs, three N-  
329 terminal truncated OsTPLn, OsTPR1n, and OsTPR2n were respectively fused  
330 with the BD. The full-length of OsIRO2 and OsIRO3 were respectively fused  
331 with the AD. The results showed that OsIRO3, but not OsIRO2, could interact  
332 with OsTPL/OsTPRs, which is consistent with the fact that OsIRO3 is a  
333 negative regulator and OsIRO2 a positive regulator. To further investigate  
334 whether the EAR motif of OsIRO3 is responsible for the interactions with  
335 OsTPL/OsTPRs, we constructed a mutated version of OsIRO3 (OsIRO3m)  
336 with a mutated EAR motif (LxAxL). Interaction tests indicated that the  
337 mutation of EAR enabled OsIRO3m not to interact with OsTPL/OsTPRs,  
338 suggesting that the EAR motif is required for the interactions. Next, we  
339 performed pull-down assays in which OsTPLn was used as a representative  
340 (Figure 6C). The results suggest that OsTPLn could pull down OsIRO3. The  
341 tripartite split-GFP assays further confirmed that their interaction occurs in the  
342 nucleus (Figure 6D). Taken together, these results indicated that OsIRO3  
343 interacts with OsTPL/OsTPRs co-repressors and its EAR motif is responsible

344 for the interactions.

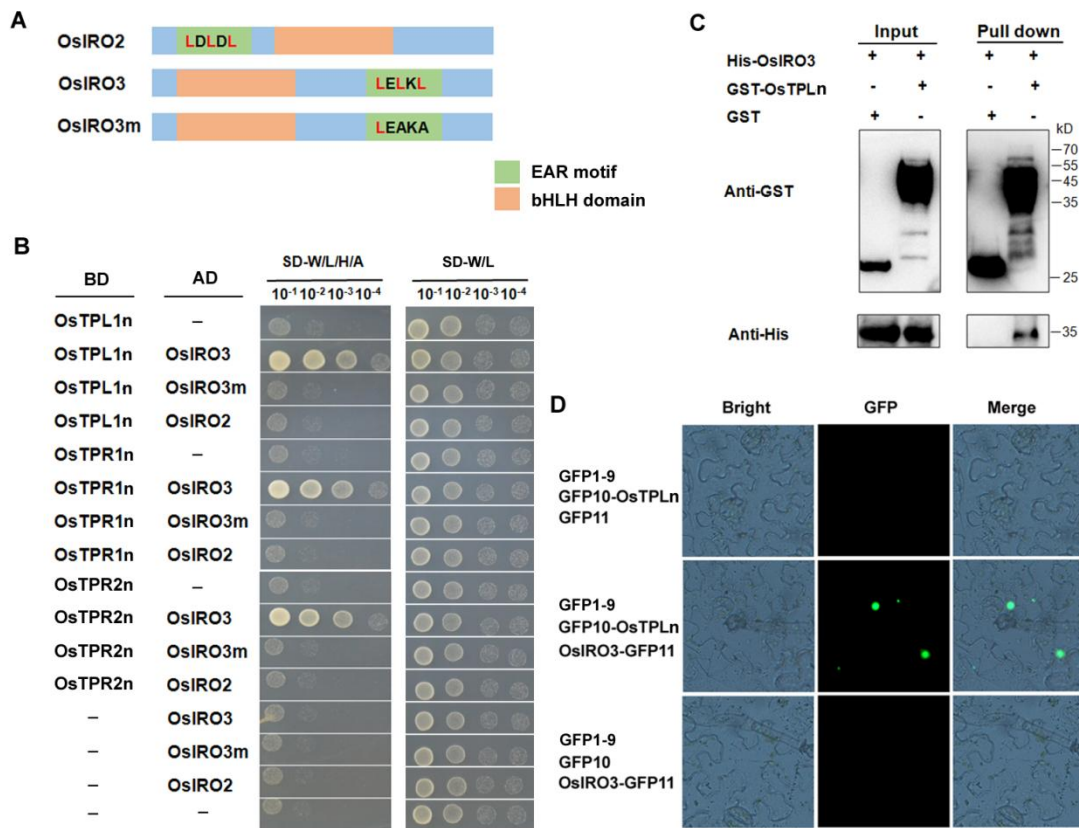

345

346 **Figure 6. OsIRO3 interacts with the co-repressors OsTPL/OsTPRs.**  
 347 (A) Schematic diagram of bHLH domain and EAR motif in the OsIRO2 and  
 348 OsIRO3.  
 349 (B) The EAR motif is required for the interactions between OsIRO3 and  
 350 OsTPL/OsTPRs. Yeast cotransformed with different BD and AD plasmid  
 351 combinations was spotted on synthetic dropout medium lacking Leu/Trp (SD-  
 352 T/L) or Trp/Leu/His/Ade (SD-T/L/H/A).  
 353 (C) Pull-down assays. The N-terminal of OsTPL was fused with the GST tag,  
 354 and OsIRO3 was fused with the His tag. Recombinant proteins were  
 355 expressed in *E. coli*. Proteins were pulled down by glutathione Sepharose 4B  
 356 and detected using the anti-His or anti-GST antibody.  
 357 (D) Interaction of OsIRO3 and OsTPLn in plant cells. Tripartite split-sfGFP  
 358 complementation assays were performed. OsTPLn was fused with GFP10,  
 359 and OsIRO3 with GFP11. The constructs were introduced into agrobacterium  
 360 respectively, and the indicated combinations were co-expressed in *N.*  
 361 *benthamiana* leaves.  
 362

### 363 The repression function of OsIRO3 partially depends on its EAR motif

364 Having confirmed that OsIRO3 interacts with OsTPL/OsTPRs through its EAR  
 365 motif, we asked if the EAR motif is crucial for the repression function of

366 OsIRO3. To test this, we carried out reporter-effector transient expression  
367 assays, in which *Pro<sub>OsIRO2</sub>:nGFP* was used as the reporter. OsIRO3 strongly  
368 reduced the expression of *GFP* whereas OsIRO3m displayed weak inhibitory  
369 effect on the expression of *GFP*. We further examined the influence of  
370 OsIRO3m on OsPRI1. When co-expressed with OsPRI1, both OsIRO3 and  
371 OsIRO3m repressed the expression of *GFP* compared with the control (MYC),  
372 but the inhibitory effect of OsIRO3m was not as strong as that of OsIRO3  
373 (Figure 7A). These data suggest that the repression function of OsIRO3 is  
374 partially dependent on its EAR motif.

375 Given that the EAR motif affects the repression function of OsIRO3, we  
376 wanted to know whether the EAR motif also affects its biological functions.  
377 For this aim, we constructed transgenic plants overexpressing *OsIRO3* and  
378 *OsIRO3m*, respectively (Figure S2). Under Fe sufficient conditions, both  
379 *OsIRO3-OX* and *OsIRO3m-OX* plants grew as well as the wild type plants  
380 (Figure 7B). Under Fe deficient conditions, two independent *OsIRO3*  
381 overexpression lines (*OE9* and *OE10*) showed hypersensitivity to Fe  
382 deficiency compared with the wild-type plants, including chlorotic leaves and  
383 reduced shoot height, which is consistent with the previous study (Zheng et al.,  
384 2010). Although the *OsIRO3m* overexpression lines (*mOE-1* and *mOE-14*)  
385 also displayed sensitivity to Fe deficiency, they were less sensitive to Fe  
386 deficiency compared with the *OsIRO3* overexpression plants. Taken together,  
387 our results suggest that the EAR motif is necessary for the biological functions  
388 of OsIRO3.

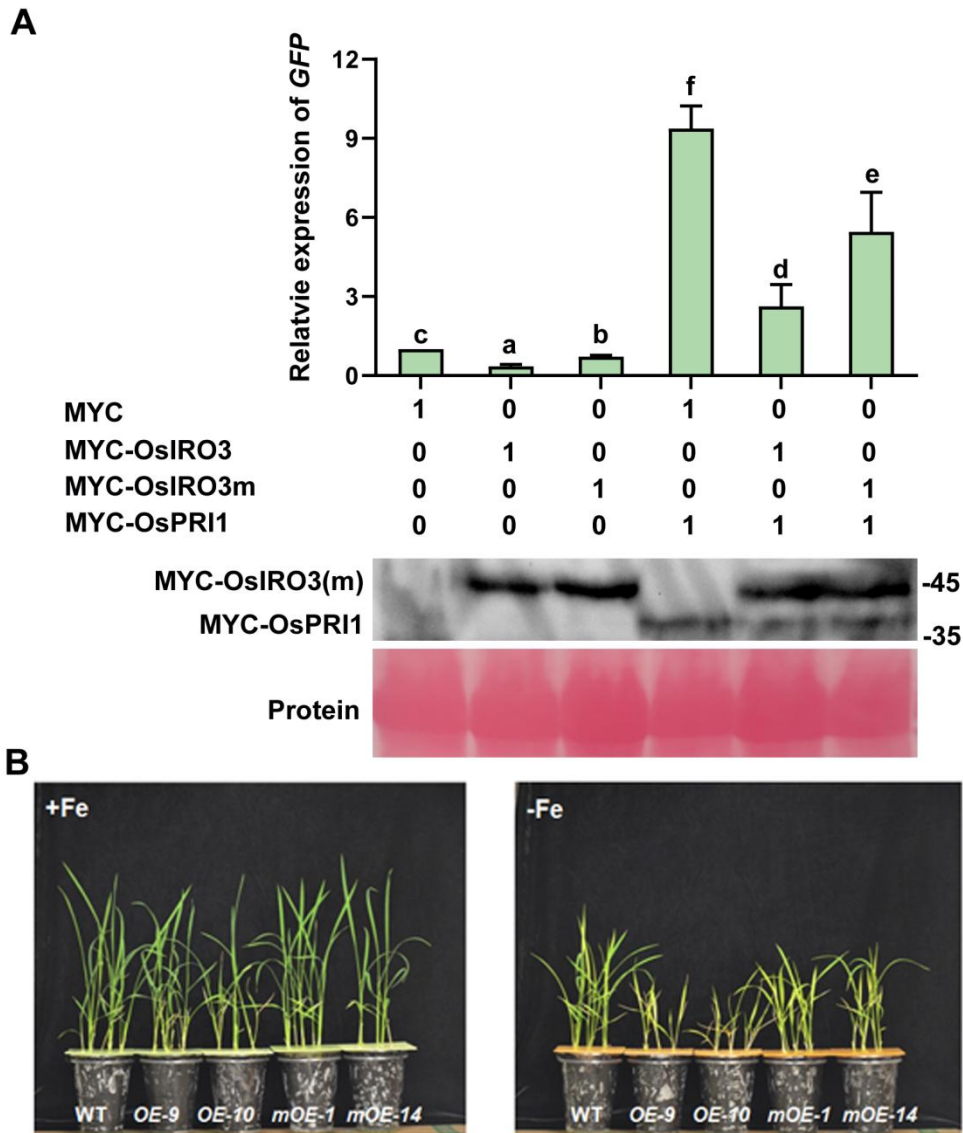

389

390 **Figure 7. The EAR motif partially contributes to the repression function**  
 391 **of OsIRO3.**

392 (A) The EAR motif is partially required for the repression function of OsIRO3.  
 393 The reporter and effectors are shown in Figure 3B. Protein levels of effectors  
 394 were detected by immunoblot. Ponceau staining shows equal loading. The  
 395 abundance of *GFP* was normalized to that of *NPTII*. The value with the empty  
 396 vector as an effector was set to 1. The different letters above each bar  
 397 indicate statistically significant differences as determined by one-way ANOVA  
 398 followed by Tukey's multiple comparison test ( $P < 0.05$ ).

399 (B) Phenotypes of *OsIRO3(m)* overexpression plants. Seeds were germinated  
 400 on wet paper for seven days, and then seedlings were shifted in +Fe (0.1 mM  
 401  $\text{Fe}^{3+}$ ) or -Fe (Fe free) solution for two weeks.

402

403

## 404 **DISCUSSION**

405 Plants have evolved intricate mechanisms to maintain Fe homeostasis. When  
406 facing Fe deficiency conditions, plants up-regulate the expression of Fe  
407 deficiency inducible responsive genes, thereby promoting Fe absorption to  
408 meet the plant's needs. However, excessive Fe uptake is prone to result in  
409 reactive oxygen species which are toxic to plant cells. The balance between  
410 positive regulatory factors to activate the Fe uptake system and negative  
411 regulatory factors to suppress it maintains Fe homeostasis in plants. *OsIRO2*  
412 is a crucial regulator for the Fe uptake system in rice. To maintain Fe  
413 homeostasis, rice plants activate *OsIRO2* under Fe deficient conditions, and  
414 suppress it under Fe sufficient conditions. Previous studies have shown that  
415 three *OsPRI* proteins directly and positively regulate *OsIRO2* (Zhang et al.,  
416 2017, 2020). However, it is still unclear which transcription factors directly and  
417 negatively regulate *OsIRO2*. Here, we provide evidence that *OsIRO3* not only  
418 directly represses the expression of *OsIRO2* by associating with its promoter,  
419 but also indirectly by inhibiting the transcription activation of *OsPRI1/2* to  
420 *OsIRO2*.

421 *OsIRO3* was identified as a negative regulator of Fe homeostasis since its  
422 overexpression leads to chlorotic leaves, decreased Fe concentration and  
423 reduced expression of many Fe deficiency inducible genes (Zheng et al.,  
424 2010). Notably, the loss-of-function of *OsIRO3* causes enhanced shoot Fe  
425 accumulation and necrotic spots in leaves under Fe deficient conditions  
426 (Figure 1B). Two different group recently reported the similar phenotypes of  
427 *iro3* mutants and explained that the increased ROS might contribute to the  
428 leaf necrosis of *iro3* mutants (Wang et al., 2020a; Wang et al., 2020b).

429 However, regarding to the expression of Fe deficiency inducible genes, these  
430 two groups showed different results. Wang et al. (2020a) showed that the  
431 expression of Fe deficiency inducible genes was increased in *iro3* under Fe  
432 deficient conditions, and Wang et al. (2020b) did not observe the change of  
433 those genes except for *OsNAS3*. It is very likely that the different results are  
434 attributed to their different experimental conditions. Our results support that  
435 loss-of-function of *OsIRO3* promotes the expression of Fe deficiency inducible  
436 genes.

437 When suffering Fe deficiency, plants stimulate their Fe uptake systems to  
438 acquire more Fe. At the same time, Fe deficiency can lead to the inactivity of  
439 many ROS scavengers which require Fe as co-factors. A burst of Fe influx is  
440 prone to production of radical oxygen species, which are toxic to plant cells.  
441 The finetune of Fe uptake system ensures the viability of cells, hence the  
442 health of plants. As a key regulator of the Fe uptake system, the transcription  
443 of *OsIRO2* must be tightly regulated. It has been revealed how the  
444 transcription of *OsIRO2* is activated directly under Fe deficient conditions  
445 (Zhang et al., 2017, 2020). It was unclear how the transcription of *OsIRO2* is  
446 repressed directly. Our data suggest that *OsiIRO3* directly recognizes the  
447 *OsIRO2* promoter (Figure 3A), and represses the transcription of *OsIRO2*  
448 (Figure 3C). In addition to the direct repression, *OsiIRO3* also indirectly  
449 represses the transcription of *OsIRO2* since *OsiIRO3* interacts with *OsPRI1/2*  
450 to attenuate their transactivation activity towards *OsIRO2* (Figure 5A). Thus,  
451 the balance between promotion and repression of *OsIRO2* finetunes the  
452 abundance of *OsIRO2*, hence maintaining appropriate Fe levels in cells. In  
453 the *iro3* mutants, the repression of *OsIRO2* by *OsiIRO3* is cancelled, and the



454 expression of *OsIRO2* is out of control, finally resulting in the Fe toxicity  
455 symptom of leaves. It has been confirmed that *OsIRO2* and *OsFIT* interact  
456 with each other to control the Strategy II genes (Liang et al., 2020; Wang et al.,  
457 2020). Notably, the overexpression of *OsFIT* also causes leaf necrosis  
458 symptoms similar to that of *iro3* under Fe deficient conditions (Liang et al.,  
459 2020). Therefore, it is very likely that the excessive activation of Fe uptake  
460 system accounts for the Fe toxicity symptoms under Fe deficient conditions.  
461 Meanwhile, the *iro3* mutants accumulate more Fe only in the shoot under Fe  
462 deficient conditions (Figure 1C), and *OsIRO2* and *OsFIT* and their target  
463 genes are induced in the roots of *iro3* under Fe deficient conditions (Figure 2).  
464 It is very likely that *OsIRO2* controls not only the Fe uptake from soil to root,  
465 but also Fe translocation from root to shoot. Although *OsFIT* is also negatively  
466 regulated by *OsIRO3*, a direct link between them is still missing. *OsIRO3*  
467 more likely indirectly down-regulates its transcription.

468 *OsIRO3* is a negative regulator of Fe homeostasis, however, it was unclear  
469 how *OsIRO3* exerts its repressive function. There are two types of  
470 transcriptional repressors, active and passive repressors. Active  
471 transcriptional repressors function by recruiting the transcriptional  
472 corepressors, such as *OsTPL/OsTPRs*, while passive repressors compete  
473 with positive transcription factors for binding to target gene promoters. Here,  
474 we reveal that *OsIRO3* can act as an active repressor by recruiting the  
475 transcriptional corepressors *OsTPL/OsTPRs* (Figure 6). Our EMSA assays  
476 confirmed that *OsIRO3* can bind to the *OsIRO2* promoter which is also  
477 targeted by *OsPRI1/2/3* (Zhang et al., 2017, 2020). It is very likely that  
478 *OsIRO3* competes with *OsPRI1/2/3* for binding to the *OsIRO2* promoter so



479 that less OsPRI proteins are involved in the transcription initiation of *OsIRO2*.

480 Therefore, OsIRO3 might also act as a passive repressor.

481 OsIRO2 is an ortholog of Arabidopsis bHLH Ib subgroup members  
482 (AtbHLH38, AtbHLH39, AtbHLH100, and AtbHLH101). Arabidopsis bHLH Ib  
483 subgroup members interact with AtFIT to modulate the expression of Strategy  
484 I genes (Yuan et al., 2008; Wang et al., 2013) while OsIRO2 interacts with  
485 OsFIT to control the expression of Strategy II genes (Liang et al., 2020; Wang  
486 et al., 2020). Arabidopsis bHLH IVc proteins directly regulate bHLH Ib genes  
487 (Zhang et al., 2015; Li et al., 2016; Liang et al., 2017) while rice bHLH IVc  
488 proteins directly target *OsIRO2* (Zhang et al., 2017, 2020). Although plants  
489 utilize different strategies to take up Fe from soil, they have evolved this  
490 conserved regulatory mechanism to control the Fe uptake systems. We reveal  
491 that OsIRO3 functions as a brake to restrict the expression of *OsIRO2* under  
492 Fe deficient conditions. A latest study revealed that AtbHLH11 interacts with  
493 bHLH IVc members and inhibits the transcription activation of the latter to  
494 bHLH Ib genes, and that AtbHLH11 can also recruit the co-repressors  
495 AtTPL/AtTPRs (Li et al., 2022). However, there is no evidence supporting that  
496 bHLH Ib genes are the direct targets of AtbHLH11. Furthermore, *OsIRO3* is  
497 induced under Fe deficient conditions (Zheng et al., 2010) whereas *AtbHLH11*  
498 is repressed (Li et al., 2022). Thus, OsIRO3 regulates the Fe deficiency  
499 response in a manner different from AtbHLH11. OsIRO3 is a close homolog of  
500 Arabidopsis AtPYE (POPEYE/AtbHLH47) (Zheng et al., 2010). AtPYE directly  
501 targets *AtZIF1*, *AtFRO3* and *AtNAS4* which are involved in Fe homeostasis  
502 (Long et al., 2010). Similarly, OsIRO3 directly regulates *OsNAS3* in rice  
503 (Wang et al., 2020b). Arabidopsis bHLH IVc subgroup members (AtbHLH34,

504 AtbHLH104, AtbHLH105, and AtbHLH115) correspond to rice bHLH IVc  
505 subgroup members (OsPRI1, OsPRI2, OsPRI3 and OsPRI4) (Zhang et al.,  
506 2020). Similar to AtPYE which physically interacts with three bHLH IVc  
507 members AtbHLH104/105/115 (Long et al., 2010; Selote et al., 2015), OsIRO3  
508 interacts with two bHLH IVc members OsPRI1/2 (Figure 4). Although AtPYE  
509 and OsIRO3 share these similarities, they regulate Fe homeostasis in  
510 different manners. Unlike the *iro3* mutant plants which accumulate more Fe  
511 only in the shoot under Fe deficient conditions, *pye* mutant plants accumulate  
512 more Fe both in the root and shoot irrespective of Fe status (Long et al.,  
513 2010). Loss-of-function of *AtPYE* does not affect the expression of Fe uptake  
514 genes, such as *AtIRT1* and *AtFRO2* (Long et al., 2010), whereas loss-of-  
515 function of *OsIRO3* facilitates the expression of Fe uptake genes. Thus, there  
516 is a functional divergence between OsIRO3 and AtPYE, and Arabidopsis and  
517 rice have developed different regulatory mechanisms to repress bHLH Ib  
518 genes.

519 This study expands our knowledge of the Fe homeostasis transcription  
520 network mediated by the OsIRO3-OsIRO2 module. Based on our findings, we  
521 propose a putative working model for OsIRO3 (Figure 8). The transcription of  
522 *OsIRO2* is regulated positively by OsPRIs (OsPRI1 and OsPRI2), but  
523 negatively by OsIRO3. OsPRIs directly associate with and activate the  
524 promoter of *OsIRO2*. In contrast, OsIRO3 represses *OsIRO2* in two different  
525 manners: (a) directly binding to the *OsIRO2* promoter and repressing its  
526 transcription by recruiting the co-repressors OsTPL/OsTPRs; (b) inhibiting the  
527 transcription activation ability of OsPRIs towards *OsIRO2*. Under Fe deficient  
528 conditions, the balance of OsPRIs and OsIRO3 ensures that *OsIRO2* is

529 expressed at an appropriate level. When the function of *OsIRO3* is lost, the  
530 repression of *OsIRO2* is removed, resulting in excessive expression of  
531 *OsIRO2*. This work enhances our understanding of the Fe deficiency  
532 response signaling pathway in rice.

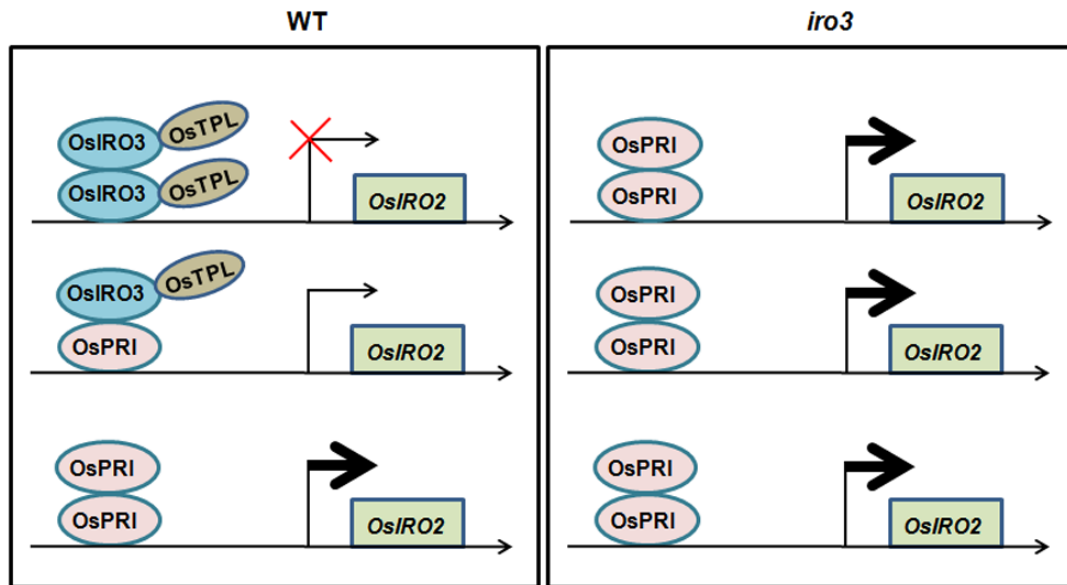

533

534 **Figure 8. A working model of *OsIRO3* in Fe homeostasis.**

535 Like *OsPRIs* (*OsPRI1/2*), *OsIRO3* directly associates with the promoter of  
536 *OsIRO2*. *OsIRO3* can function as an active repressor by recruiting the  
537 transcriptional corepressors *OsTPL/OsTPRs*. *OsIRO3* also physically  
538 interacts with *OsPRIs*. Under Fe-deficient conditions, *OsIRO3* and *OsPRIs*  
539 are abundant and antagonistically regulate the expression of *OsIRO2*. In wild  
540 type (WT), *OsPRIs* activate the expression of *OsIRO2*; on the other hand,  
541 *OsIRO3* represses the expression of *OsIRO2* either by directly binding to the  
542 promoter of *OsIRO2* or by inhibiting the transcription activation of *OsPRIs*  
543 towards *OsIRO2*. The balance of *OsPRIs* and *OsIRO3* under Fe deficient  
544 conditions ensures an appropriate level of *OsIRO2*. In the *iro3* mutants, the  
545 repression of *OsIRO2* by *OsIRO3* is cancelled, resulting in the over-  
546 accumulation of *OsIRO2* transcripts.

547

548

549

550

551

## 552 MATERIALS AND METHODS

### 553 Plant materials and growth conditions

554 Rice cultivar 'Nipponbare' was used in this study. Plants were grown in a  
555 greenhouse with a photoperiod of 14 h light 28°C and 10 h dark at 22°C. For  
556 hydroponic culture assays, Fe-sufficient solution was prepared in half-strength  
557 Murashige and Skoog with 0.1 mM Fe (III)-EDTA and Fe-deficient solution in  
558 the same media without Fe.

559

### 560 Generation of transgenic plants

561 The editing vectors were constructed as described previously (Liang et al.,  
562 2016). Two different target sites for *OsIRO3* were designed. The OsU6a  
563 promoter driving the sgRNA containing a specific target site was cloned into  
564 the pMH-SA vector by the restriction enzyme sites *Spe* I and *Asc* I. Two  
565 independent constructs were used for rice transformation. Homozygous  
566 mutant lines were identified by PCR sequencing.

567 For the construction of overexpression vectors, HA-OsIRO3 and HA-  
568 OsIRO3m were amplified from GAD-OsIRO3 and GAD-OsIRO3m,  
569 respectively, and cloned between the maize ubiquitin promoter and the NOS  
570 terminator in the pUN1301 binary vector.

571

### 572 EMSA

573 OsIRO3 was cloned into the pET-28a(+) vector and the resulting plasmids  
574 was introduced into *Escherichia coli* BL21(DE3) for protein expression.  
575 Cultures were incubated with 0.5 M isopropyl  $\beta$ -D-1-thiogalactopyranoside at  
576 22°C for 16h, and proteins were extracted and purified by using the His-tag

577 Protein Purification Kit (Beyotime, China) following the manufacturer's  
578 protocol. EMSA was performed using the Chemiluminescent EMSA Kit  
579 (Beyotime, China) following the manufacturer's protocol. Briefly, two  
580 complementary single-strand DNA primers were synthesized with a biotin  
581 label at the 5' end. Two complementary primers were mixed and annealed to  
582 form the biotin-probe. The two biotin-unlabeled single-strand DNA primers  
583 were used as competitors, and the His protein alone was used as the  
584 negative control.

585

### 586 **Reverse transcription and quantitative PCR**

587 Total RNA extracted from rice roots using TRIzol reagent (Invitrogen, USA).  
588 cDNA was synthesized by the use of PrimeScript™ RT reagent Kit with gDNA  
589 Eraser (Perfect Real Time) according to the reverse transcription protocol  
590 (Takara). The resulting cDNA was subjected to relative quantitative PCR using  
591 a SYBR Premix Ex Taq™ kit (TaKaRa) on a Roche LightCycler 480 real-time  
592 PCR machine, according to the manufacturer's instructions. All PCR  
593 amplifications were performed in three biological replicates with *OsACTIN1*  
594 and *OsOBP* as the internal controls. Primers used in this paper are listed in  
595 Supplemental Table S1.

596

### 597 **Fe Measurement**

598 To determine Fe concentration, 14-d-old seedlings grown in 1/2 MS liquid with  
599 0.1 mM Fe (III)-EDTA were transferred to Fe-sufficient (0.1 mM Fe (III)-EDTA)  
600 or Fe-deficient (Fe free) liquid media for 7 d. The shoots and roots were  
601 harvested separately and dried at 65°C for 3 d. For each sample, about 500

602 mg dry weight of roots or shoots was digested with 5 mL of 11 M HNO<sub>3</sub> and 2  
603 mL of 12 M H<sub>2</sub>O<sub>2</sub> for 30 min at 220°C. Fe concentration was measured using  
604 Inductively Coupled Plasma Mass Spectrometry (ICP-MS).

605

#### 606 **Yeast two-hybrid assays**

607 For yeast two-hybrid assays, the N-terminal truncated version of OsIRO3n,  
608 OsTPLn, OsTPR1n, and OsTPR2n were respectively cloned into pGBKT7.  
609 The sequence encoding full-length OsPRI1, OsPRI2, OsIRO2, OsIRO3, and  
610 OsIRO3m were respectively cloned into pGADT7. Vectors were transformed  
611 into yeast strain Y2HGold (Clontech, Japan). Growth was determined as  
612 described in the Yeast Two-Hybrid System User Manual (Clontech, Japan).

613

#### 614 **Protein interaction in plant cells**

615 The GFP1-9, GFP10, and GFP11 sequences of superfolder GFP were cloned  
616 into separate pER8 vectors under the estradiol induction promoter, generating  
617 pTG-GFP1-9, pTG-GFP10, and pTG-GFP11, respectively. OsIRO3 and  
618 OsTPLn were cloned into pTG-GFP10 with an N-terminal GFP10 tag, and  
619 OsPRI1/2 and OsIRO3 were cloned into pTG-GFP11 with a C-terminal GFP11  
620 tag. All vectors were introduced into *A. tumefaciens* (strain EHA105) and  
621 various combinations of *Agrobacterium* cells were infiltrated into leaves of *N.*  
622 *benthamiana* in infiltration buffer (0.2 mM acetosyringone, 10 mM MgCl<sub>2</sub>, and  
623 10 mM MES [pH 5.6]). Gene expression was induced 1 day after  
624 agroinfiltration by injecting 20 mM β-estradiol into the abaxial side of the  
625 leaves. Epidermal cells were observed and recorded under a Carl Zeiss  
626 Microscope.

627

## 628 **Pull-down assays**

629 OsPRI1/2 and OsTPLn were cloned into pGEX-4T-1 respectively, and  
630 OsIRO3 was cloned into pET-28a (+). All plasmids were introduced into  
631 *Escherichia coli* BL21 cells (TransGen Biotech). GST, GST-OsPRI1/2, GST-  
632 OsTPLn, and His-OsIRO3 proteins were induced by 0.1 mM isopropyl-b-  
633 thiogalactopyranoside (IPTG) at 16°C for 20 h. Soluble GST, GST-OsPRI1/2,  
634 and GST-OsTPL-N were extracted and immobilized to glutathione affinity  
635 resin (Beyotime Biotechnology). For pull-down assays, His-OsIRO3 fusion  
636 proteins purified from *E. coli* cell lysate were incubated with the immobilized  
637 GST, GST-OsPRI1/2, and GST-OsTPLn in GST pull-down protein binding  
638 buffer (50 mM Tris-HCl, pH 8.0, 200 mM NaCl, 1 mM EDTA, 1%NP-40, 1 mM  
639 DTT, 10 mM MgCl<sub>2</sub>, 1 × protease inhibitor cocktail from Roche) for 2 h at 4°C.  
640 Proteins were eluted in the elution buffer, and the interaction was determined  
641 by western blot using anti-His antibody and anti-GST antibody (TransGen  
642 Biotech).

643

## 644 **Transient expression assays**

645 The nGFP driven by a synthetic promoter which consists of five repeats of  
646 GAL4 binding motif and the minimal CaMV 35S promoter was described  
647 previously (Li et al., 2022). The GAL4 DNA binding domain was fused with  
648 mCherry containing a nuclear localization signal to generate 35S:BD-  
649 nmCherry. OsPRI1 was fused with BD-nmCherry as the effector. The  
650 promoter of OsIRO2 was used to drive nGFP as a reporter.

651 The promoter of *OsIRO2* was used to drive nGFP as a reporter. MYC-



652 OsIRO3(m) and MYC-OsPRI1 were respectively cloned downstream of the  
653 35S promoter to generate 35S:MYC-OsIRO3(m) and 35S:MYC-OsPRI1 as  
654 effectors.

655 *Agrobacterium tumefaciens* strain EHA105 was used for plasmid  
656 transformation. Agrobacterial cells were infiltrated into leaves of *N.*  
657 *benthamiana* by the infiltration buffer (0.2 mM acetosyringone, 10 mM MgCl<sub>2</sub>,  
658 and 10 mM MES, pH 5.6). For transcription activation assay, the final optical  
659 density at 600 nm value was 1.5. Agrobacteria were mixed at the ratio as  
660 indicated and a final concentration of 0.2 mM acetosyringone was added.  
661 After infiltration, plants were placed in the dark at 24°C for 48 h before  
662 fluorescence observation and RNA extraction. The transcript abundance of  
663 *GFP* was normalized to *NPTII*.

664

#### 665 **Western blot**

666 For total protein extraction, samples were ground to a fine powder in liquid  
667 nitrogen and then resuspended and extracted in protein extraction buffer (50  
668 mM Tris, 150 mM NaCl, 1% NP-40, 0.5% sodium deoxycholate, 0.1% SDS, 1  
669 mM PMSF, 1 x protease inhibitor cocktail [pH 8.0]). Sample was loaded onto  
670 12% SDS-PAGE gels and transferred to nitrocellulose membranes. The  
671 membrane was blocked with TBST (10 mM Tris-Cl, 150 mM NaCl, and 0.05%  
672 Tween 20, pH8.0) containing 5% nonfat milk (TBSTM) at room temperature  
673 for 60 min and incubated with primary antibody in TBSTM (overnight at 4°C).  
674 Membranes were washed with TBST (three times for 5 min each) and then  
675 incubated with the appropriate horseradish peroxidase-conjugated secondary  
676 antibodies in TBSTM at room temperature for 1.5 h. After washing three times,

677 bound antibodies were visualized with ECL substrate.

678

## 679 **ACKNOWLEDGMENTS**

680 We thank the Institutional Center for Shared Technologies and Facilities of  
681 Xishuangbanna Tropical Botanical Garden, CAS for assistance in the  
682 determination of metal contents. We also thank the Crops Conservation and  
683 Breeding Base of XTBG for rice planting.

684

## 685 **Finding**

686 This work was supported by the National Natural Science Foundation of  
687 China (32001533).

688

## 689 **AUTHOR CONTRIBUTIONS**

690 G.L. conceived the project. C.L. and Y.L. constructed plasmids. C.L.  
691 characterized plants, determined gene and protein expression, and conducted  
692 cellular assays. C.L., Y.L. and P.X. grew rice and analyzed data. C.L and G.L.  
693 wrote the manuscript. All authors discussed and approved the manuscript.

694 **Conflict of interest statement.** None declared.

695 **REFERENCES**

696 Balk, J., and Schaedler, T.A. (2014). Fe cofactor assembly in plants. *Annu.*  
697 *Rev. Plant Biol.* 65: 125-153.

698 Bashir K, Nozoye T, Nagasaka S, Rasheed S, Miyauchi N, Seki M, Nakanishi  
699 H, Nishizawa NK. (2017). Paralogs and mutants show that one DMA  
700 synthase functions in iron homeostasis in rice. *J Exp Bot.* 68: 1785-1795.

701 Briat JF, Dubos C, and Gaymar F. (2015). Fe nutrition, biomass production,  
702 and plant product quality. *Trends Plant Sci.* 20: 1360-1385.

703 Causier B, Ashworth M, Guo W, Davies B. (2012). The TOPLESS interactome:  
704 a framework for gene repression in *Arabidopsis*. *Plant Physiol.* 158: 423-  
705 438.

706 Cheng L, Wang F, Shou H, Huang F, Zheng L, He F, Li J, Zhao FJ, Ueno D,  
707 Ma JF, Wu P. (2007). Mutation in nicotianamine aminotransferase  
708 stimulated the Fe(II) acquisition system and led to iron accumulation in  
709 rice. *Plant Physiol.* 145: 1647-1657.

710 Fisher F, Goding CR. (1992). Single amino acid substitutions alter helix-loop-  
711 helix protein specificity for bases flanking the core CANNTG motif. *EMBO*  
712 *J.* 11: 4103-4109.

713 Hänsch R, and Mendel RR. (2009). Physiological functions of mineral  
714 micronutrients (Cu, Zn, Mn, Fe, Ni, Mo, B, Cl). *Curr. Opin. Plant Biol.* 12:  
715 259-266.

716 Inoue H, Higuchi K, Takahashi M, Nakanishi H, Mori S, Nishizawa NK. (2003).  
717 Three rice nicotianamine synthase genes, OsNAS1, OsNAS2, and

718 OsNAS3 are expressed in cells involved in long-distance transport of iron  
719 and differentially regulated by iron. *Plant J.* 36: 366-381.

720 Inoue H, Kobayashi T, Nozoye T, Takahashi M, Kakei Y, Suzuki K, Nakazono  
721 M, Nakanishi H, Mori S, Nishizawa NK. (2009). Rice OsYSL15 is an Fe-  
722 regulated Fe (III)-deoxymugineic acid transporter expressed in the roots  
723 and is essential for Fe uptake in early growth of the seedlings. *J. Biol.*  
724 *Chem.* 284: 3470-3479.

725 Ishimaru Y, Suzuki M, Tsukamoto T, Suzuki K, Nakazono M, Kobayashi T,  
726 Wada Y, Watanabe S, Matsushashi S, Takahashi M, Nakanishi H, Mori S,  
727 Nishizawa NK. (2006). Rice plants take up Fe as an Fe<sup>3+</sup>-  
728 phytosiderophore and as Fe<sup>2+</sup>. *Plant J.* 45: 335-346.

729 Kagale S, Links MG, Rozwadowski K. (2010). Genome-wide analysis of  
730 ethylene-responsive element binding factor-associated amphiphilic  
731 repression motif-containing transcriptional regulators in Arabidopsis. *Plant*  
732 *Physiol.* 152: 1109-1134.

733 Kobayashi T, Nagasaka S, Senoura T, Itai RN, Nakanishi H, Nishizawa NK.  
734 (2013). Fe-binding haemerythrin RING ubiquitin ligases regulate plant Fe  
735 responses and accumulation. *Nat Commun.* 4: 2792.

736 Kobayashi T, Ozu A, Kobayashi S, An G, Jeon JS, Nishizawa NK. (2019).  
737 OsbHLH058 and OsbHLH059 transcription factors positively regulate Fe  
738 deficiency responses in rice. *Plant Mol Biol.* 101: 471-486.

739 Lee S, Chiecko JC, Kim SA, Walker EL, Lee Y, Guerinot ML, An G. (2009).  
740 Disruption of OsYSL15 leads to Fe inefficiency in rice plants. *Plant*  
741 *Physiol.* 150: 786-800.

- 742 Li X, Zhang H, Ai Q, Liang G, Yu D. (2016). Two bHLH transcription factors,  
743 bHLH34 and bHLH104, regulate Fe homeostasis in *Arabidopsis thaliana*.  
744 Plant Physiol. 170: 2478-2493.
- 745 Li Y, Lei R, Pu M, Cai Y, Lu C, Li Z, Liang G. (2022). bHLH11 inhibits bHLH  
746 IVc proteins by recruiting the TOPLESS/TOPLESS-RELATED  
747 corepressors. Plant Physiol. 188: 1335-1349.
- 748 Liang G, Zhang H, Li X, Ai Q, and Yu D. (2017). bHLH transcription factor  
749 bHLH115 regulates Fe homeostasis in *Arabidopsis thaliana*. J. Exp. Bot.  
750 68: 1743-1755.
- 751 Liang G, Zhang H, Li Y, Pu M, Yang Y, Li C, Lu C, Xu P, Yu D. (2020). *Oryza*  
752 *sativa* FER-LIKE FE DEFICIENCY-INDUCED TRANSCRIPTION  
753 FACTOR (OsFIT/OsbHLH156) interacts with OsIRO2 to regulate Fe  
754 homeostasis. J Integr Plant Biol. 62: 668-689.
- 755 Liang G, Zhang H, Lou D, Yu D. (2016). Selection of highly efficient sgRNAs  
756 for CRISPR/Cas9-based plant genome editing. Sci Rep. 6: 21451.
- 757 Long TA, Tsukagoshi H, Busch W, Lahner B, Salt DE, and Benfey PN. (2010).  
758 The bHLH transcription factor POPEYE regulates response to Fe  
759 deficiency in *Arabidopsis* roots. Plant Cell. 22: 2219-2236.
- 760 Mori S. (1999). Fe acquisition by plants. Curr. Opin. Plant Biol. 2: 250-253.
- 761 Nozoye T, Nagasaka S, Kobayashi T, Takahashi M, Sato Y, Sato Y, Uozumi N,  
762 Nakanishi H, Nishizawa NK. (2011). Phytosiderophore efflux transporters  
763 are crucial for Fe acquisition in graminaceous plants. J. Biol. Chem. 286:  
764 5446-5454.

- 765 Ogo Y, Itai RN, Nakanishi H, Kobayashi T, Takahashi M, Mori S, Nishizawa NK.  
766 (2007). The rice bHLH protein OsIRO2 is an essential regulator of the  
767 genes involved in Fe uptake under Fe-deficient conditions. *Plant J.* 51:  
768 366-737.
- 769 Römheld, V., & Marschner, H. (1986). Evidence for a specific uptake system  
770 for Fe phytosiderophores in roots of grasses. *Plant Physiol.* 80: 175-180.
- 771 Selote D, Samira R, Matthiadis A, Gillikin JW, Long TA. (2015). Fe binding E3  
772 ligase mediates Fe response in plants by targeting basic helix-loop-helix  
773 transcription factors. *Plant Physiol.* 167: 273-286.
- 774 Shojima S, Nishizawa NK, Fushiya S, Nozoe S, Irifune T, Mori S. (1990).  
775 Biosynthesis of Phytosiderophores: In Vitro Biosynthesis of 2'-  
776 Deoxymugineic Acid from L-Methionine and Nicotianamine. *Plant Physiol.*  
777 93: 1497-1503.
- 778 Toledo-Ortiz G, Huq E, Quail PH. (2003). The *Arabidopsis* basic/helix-loop-  
779 helix transcription factor family. *Plant Cell.* 15: 1749-1770.
- 780 Valko M, Morris H, Cronin MT. (2005). Metals, toxicity and oxidative stress.  
781 *Curr Med Chem.* 12: 1161-1208.
- 782 Wang F, Itai, RN, Nozoye T, Kobayashi T, Nishizawa NK, Nakanishi H.  
783 (2020a). The bHLH protein OsIRO3 is critical for plant survival and iron  
784 (Fe) homeostasis in rice (*Oryza sativa* L.) under Fe-deficient conditions.  
785 *Soil Science and Plant Nutrition.* 66: 579-592.
- 786 Wang N, Cui Y, Liu Y, Fan H, Du J, Huang Z, Yuan Y, Wu H, Ling HQ. (2013).  
787 Requirement and functional redundancy of Ib subgroup bHLH proteins for

788 Fe deficiency responses and uptake in *Arabidopsis thaliana*. Mol Plant. 6:  
789 503-513.

790 Wang S, Li L, Ying Y, Wang J, Shao JF, Yamaji N, Whelan J, Ma JF, Shou H.  
791 (2020). A transcription factor OsbHLH156 regulates Strategy II Fe  
792 acquisition through localising IRO2 to the nucleus in rice. New Phytol.  
793 225: 1247-1260.

794 Wang W, Ye J, Ma Y, Wang T, Shou H, Zheng L. (2020b). OsIRO3 Plays an  
795 Essential Role in Iron Deficiency Responses and Regulates Iron  
796 Homeostasis in Rice. Plants (Basel). 9: 1095.

797 Yuan Y, Wu H, Wang N, Li J, Zhao W, Du J, Wang D, Ling HQ. (2008). FIT  
798 interacts with AtbHLH38 and AtbHLH39 in regulating Fe uptake gene  
799 expression for Fe homeostasis in *Arabidopsis*. Cell Res. 18: 385-397.

800 Zhang H, Li Y, Pu M, Xu P, Liang G, Yu D. (2020). *Oryza sativa* POSITIVE  
801 REGULATOR OF FE DEFICIENCY RESPONSE 2 (OsPRI2) and OsPRI3  
802 are involved in the maintenance of Fe homeostasis. Plant Cell Environ.  
803 43: 261-274.

804 Zhang H, Li Y, Yao X, Liang G, Yu D. (2017). POSITIVE REGULATOR OF FE  
805 HOMEOSTASIS1, OsPRI1, facilitates Fe homeostasis. Plant Physiol. 175:  
806 543-554.

807 Zhang J, Liu B, Li M, Feng D, Jin H, Wang P, Liu J, Xiong F, Wang J, Wang  
808 HB. (2015). The bHLH transcription factor bHLH104 interacts with IAA -  
809 LEUCINE RESISTANT3 and modulates Fe homeostasis in *Arabidopsis*.  
810 Plant Cell. 27: 787-805.



811 Zheng L, Ying Y, Wang L, Wang F, Whelan J, Shou H. (2010). Identification of  
812 a novel Fe regulated basic helix-loop-helix protein involved in Fe  
813 homeostasis in *Oryza sativa*. BMC Plant Biol. 10: 166.

814

815 **SUPPORTING INFORMATION**

816 Additional supporting information may be found online in the Supporting  
817 Information section at the end of the article.

818 **Supplemental Figure S1.** OsIRO3 does not bind to the promoter of *OsFIT*.

819 **Supplemental Figure S2.** Expression of *OsIRO3(m)* in the overexpression  
820 plants.

821 **Supplemental Table S1.** Primers used in this paper.

822

823 **Figure Legends**

824 **Figure 1. Identification of *iro3* mutants.**

825 (A) Mutations generated in the *iro3* mutants by CRISPR/Cas9. The underlined  
826 three letters indicate the PAM region. The *iro3-del1* mutant contains a deletion  
827 of nucleotide T in exon 4 and the *iro3-del61* mutant contains a deletion of 61  
828 bp in exon 3. The genotypes of *iro3-del1* and *iro3-del61* are indicated.

829 (B) Phenotypes of *iro3* mutants. Seeds were grown in +Fe (0.1 mM Fe<sup>3+</sup>)  
830 solution for two weeks, and then shifted to +Fe or –Fe (Fe free) solution for  
831 one week.

832 (C) Fe concentration in the *iro3* mutants. Two-week-old seedlings grown in  
833 +Fe were transferred to +Fe or –Fe solution for 1 week. Shoots and roots  
834 were separately sampled and used for metal measurement. Error bars  
835 represent the SD ( $n = 3$ ). The value which is significantly different from the  
836 corresponding wild-type (WT) value was indicated by \* ( $P < 0.05$ ), as  
837 determined by Student's *t* test. DW, Dry weight.

838

839 **Figure 2. Expression of Fe deficiency inducible genes in the *iro3***

840 **mutants.**

841 Two-week-old seedlings grown in +Fe solution were transferred to +Fe or –Fe  
842 solution for 7 days. Roots were sampled and used for RNA extraction. The  
843 numbers above the bars indicate the corresponding mean values. Error bars  
844 represent the SD ( $n = 3$ ). The value which is significantly different from the  
845 corresponding wild-type (WT) value was indicated by \* ( $P < 0.05$ ), as  
846 determined by Student's  $t$  test.

847

848 **Figure 3. OsIRO3 binds to the promoter of *OsIRO2*.**

849 (A) EMSA assays. Biotin-labeled DNA probe was incubated with the  
850 recombinant His-OsIRO3 protein. An excess of unlabeled probe (Cold-Probe)  
851 or unlabeled mutated probe (Cold-Probe-m) was added to compete with  
852 labeled probe (Biotin-Probe). Biotin-probe incubated with His protein served  
853 as the negative control.

854 (B) Schematic representation of the constructs used for transient expression  
855 assays. In the reporter, the *OsIRO2* promoter was used to drive a nuclear  
856 localization sequence fused GFP (nGFP). In the effectors, MYC, MYC-  
857 OsPRI1, and MYC-OsIRO3 are under the control of the cauliflower mosaic  
858 virus (CaMV) 35S promoter.

859 (C) *GFP* transcript abundance. Protein levels of effectors were detected by  
860 immunoblot. Ponceau staining shows equal loading. *GFP* transcript  
861 abundance was normalized to *NPTII* transcript. The value with the empty  
862 vector (MYC) as an effector was set to 1. The different letters above each bar  
863 indicate statistically significant differences as determined by one-way ANOVA  
864 followed by Tukey's multiple comparison test ( $P < 0.05$ ).

865

866 **Figure 4. OsIRO3 physically interacts with OsPRI1 and OsPRI2.**

867 (A) Yeast two-hybrid analysis of the interactions between OsIRO3 and  
868 OsPRI1/2. Yeast cotransformed with different BD and AD plasmid  
869 combinations was spotted on synthetic dropout medium lacking Leu/Trp (SD-  
870 W/L) or Trp/Leu/His/Ade (SD-W/L/H/A).

871 (B) Pull-down assays. OsPRI1/2 were respectively fused with the GST tag,  
872 and OsIRO3 was fused with the His tag. Recombinant proteins were  
873 expressed in *E. coli*. Proteins were pulled down by glutathione Sepharose 4B  
874 and detected using the anti-His or anti-GST antibody.

875 (C) Protein interactions of OsIRO3 and OsPRI1/2 in plant cells. Tripartite split-  
876 sfGFP complementation assays were performed. OsPRI1 and OsPRI2 were  
877 respectively fused with GFP11, and OsIRO3 with GFP10. The constructs were  
878 introduced into agrobacterium respectively, and the indicated combinations  
879 were co-expressed in *N. benthamiana* leaves.

880

881 **Figure 5. OsIRO3 antagonizes the transcriptional activation ability of**  
882 **OsPRI1.**

883 (A) OsIRO3 represses the transcription activation of OsPRI1. The reporter  
884 and effectors are shown in Figure 3B. Protein levels of effectors were  
885 detected by immunoblot. Ponceau staining shows equal loading. The  
886 *GFP/NPTII* ratio represents the *GFP* levels relative to the internal control  
887 *NPTII*.

888 (B) Schematic representation of the constructs used for transient expression  
889 assays. In the reporter, five repeats of GAL4 binding motif and the minimal

890 CaMV 35S promoter was used as the promoter to drive the nGFP. In the  
891 effectors, BD-nmCherry and BD-nmCherry-OsPRI1 are under the control of  
892 35S promoter. In the secondary effectors, MYC and MYC-OsIRO3 are under  
893 the control of 35S promoter.

894 (C) OsIRO3 inhibits the transcriptional activation ability of OsPRI1 by direct  
895 protein-protein interaction. Protein levels of effectors were detected by  
896 immunoblot. Ponceau staining shows equal loading. The abundance of *GFP*  
897 was normalized to that of *NPTII*. The value with the control (nmCherry) was  
898 set to 1. The different letters above each bar indicate statistically significant  
899 differences as determined by one-way ANOVA followed by Tukey's multiple  
900 comparison test ( $P < 0.05$ ).

901

902 **Figure 6. OsIRO3 interacts with the co-repressors OsTPL/OsTPRs.**

903 (A) Schematic diagram of bHLH domain and EAR motif in the OsIRO2 and  
904 OsIRO3.

905 (B) The EAR motif is required for the interactions between OsIRO3 and  
906 OsTPL/OsTPRs. Yeast cotransformed with different BD and AD plasmid  
907 combinations was spotted on synthetic dropout medium lacking Leu/Trp (SD-  
908 T/L) or Trp/Leu/His/Ade (SD-T/L/H/A).

909 (C) Pull-down assays. The N-terminal of OsTPL was fused with the GST tag,  
910 and OsIRO3 was fused with the His tag. Recombinant proteins were  
911 expressed in *E. coli*. Proteins were pulled down by glutathione Sepharose 4B  
912 and detected using the anti-His or anti-GST antibody.

913 (D) Interaction of OsIRO3 and OsTPLn in plant cells. Tripartite split-sfGFP  
914 complementation assays were performed. OsTPLn was fused with GFP10,

915 and OsIRO3 with GFP11. The constructs were introduced into agrobacterium  
916 respectively, and the indicated combinations were co-expressed in *N.*  
917 *benthamiana* leaves.

918

919 **Figure 7. The EAR motif partially contributes to the repression function**  
920 **of OsIRO3.**

921 (A) The EAR motif is partially required for the repression function of OsIRO3.  
922 The reporter and effectors are shown in Figure 3B. Protein levels of effectors  
923 were detected by immunoblot. Ponceau staining shows equal loading. The  
924 abundance of *GFP* was normalized to that of *NPTII*. The value with the empty  
925 vector as an effector was set to 1. The different letters above each bar  
926 indicate statistically significant differences as determined by one-way ANOVA  
927 followed by Tukey's multiple comparison test ( $P < 0.05$ ).

928 (B) Phenotypes of *OsIRO3(m)* overexpression plants. Seeds were germinated  
929 on wet paper for seven days, and then seedlings were shifted in +Fe (0.1 mM  
930  $\text{Fe}^{3+}$ ) or -Fe (Fe free) solution for two weeks.

931

932 **Figure 8. A working model of OsIRO3 in Fe homeostasis.**

933 Like OsPRIs (OsPRI1/2), OsIRO3 directly associates with the promoter of  
934 *OsIRO2*. OsIRO3 can function as an active repressor by recruiting the  
935 transcriptional corepressors OsTPL/OsTPRs. OsIRO3 also physically  
936 interacts with OsPRIs. Under Fe-deficient conditions, OsIRO3 and OsPRIs  
937 are abundant and antagonistically regulate the expression of *OsIRO2*. In wild  
938 type (WT), OsPRIs activate the expression of *OsIRO2*; on the other hand,  
939 OsIRO3 represses the expression of *OsIRO2* either by directly binding to the

940 promoter of *OsIRO2* or by inhibiting the transcription activation of OsPRIs  
941 towards *OsIRO2*. The balance of OsPRIs and OsIRO3 under Fe deficient  
942 conditions ensures an appropriate level of *OsIRO2*. In the *iro3* mutants, the  
943 repression of *OsIRO2* by OsIRO3 is cancelled, resulting in the over-  
944 accumulation of *OsIRO2* transcripts.  
945
